# Supplementary material for: Hypolipidemic and Anti-Inflammatory Effects of Curcuma longa-Derived Bisacurone in High-Fat Diet-Fed Mice
Source: MDPI journal article supplement (doi:10.3390/ijms24119366), 2023-05-27
Supplement: s1 [file s1]

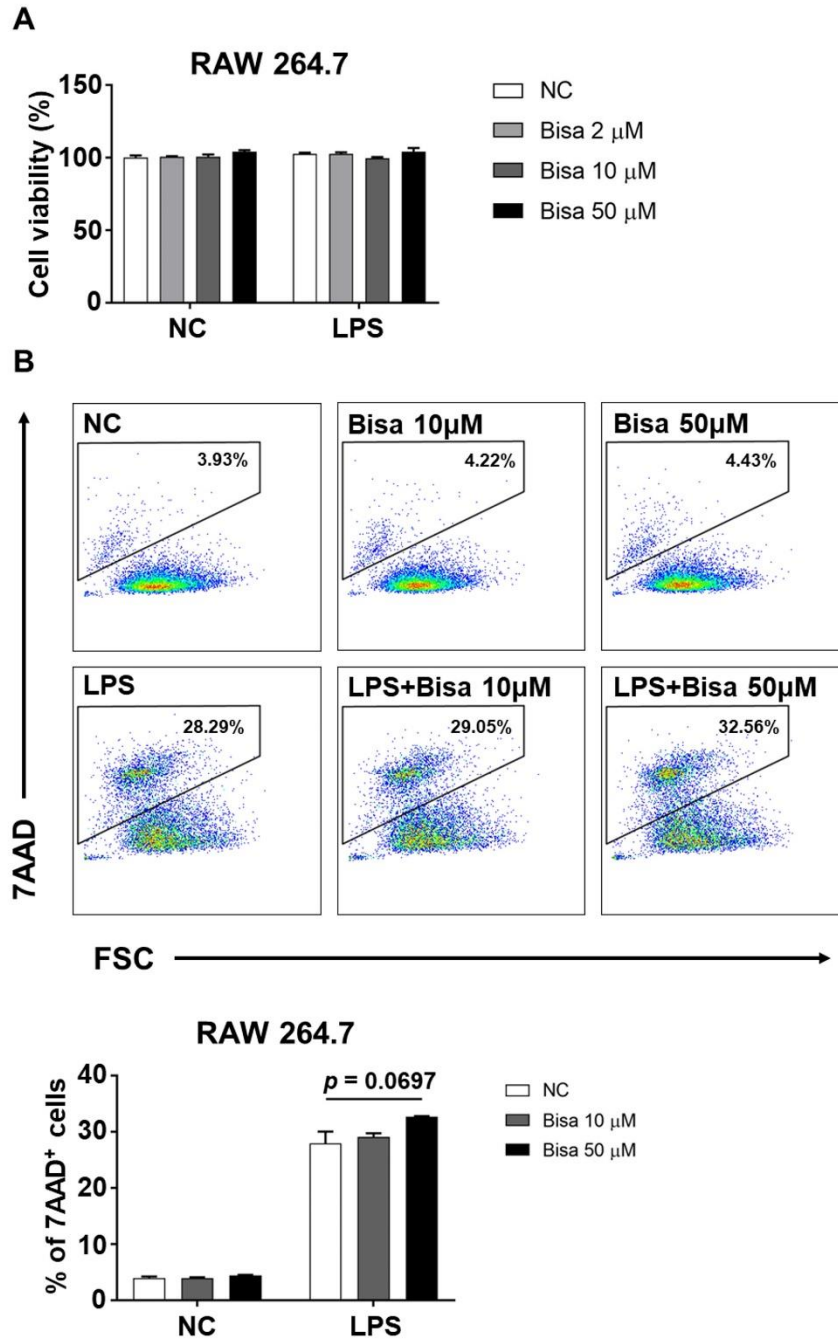

**Figure S1 .** Assessment for the cytotoxicity of bisacurone in a murine macrophage line. RAW264.7 cells were treated with 2, 10, or 50  $\mu$ M bisacurone and stimulated with 10 ng/mL of LPS for 24 hours. For assessment of cell viability, (A) the concentrations of lactate dehydrogenase in cell culture supernatants were measured using Cell Counting Kit-8 (DOJINDO LABORATORIES, Japan). (B) The cells were harvested and stained with 7-Amino-Actinomycin D (7AAD) for FACS analysis. Data represent the mean  $\pm$  SEM. Ordinary one-way ANOVA, Tukey's multiple comparisons test. Bisa: bisacurone

**Table S1. Composition of diets used in this study\*.**

|                       | Control diet<br>(CE-2)                 |       | High fat diet<br>(Quick fat)                     |       |
|-----------------------|----------------------------------------|-------|--------------------------------------------------|-------|
| Ingredients           | gm%                                    | kcal% | gm%                                              | kcal% |
| Moisture (%)          | 8.88                                   | 0     | 6.80                                             | 0     |
| Crude protein (%)     | 25.05                                  | 29    | 24.35                                            | 24    |
| Crude fat (%)         | 4.77                                   | 12    | 13.80                                            | 30    |
| Crude fiber (%)       | 4.44                                   | 0     | 3.00                                             | 0     |
| Crude ash(%)          | 7.04                                   | 0     | 5.75                                             | 0     |
| NFE (%)               | 49.82                                  | 59    | 46.30                                            | 46    |
| Energy<br>(kcal/100g) | 342.4                                  |       | 406.80                                           |       |
|                       |                                        |       |                                                  |       |
| Ingredients           |                                        |       |                                                  |       |
| Protein               | whitefish meal, soybean meal,<br>yeast |       | soybean meal, whitefish meal,<br>casein, yeast   |       |
| Fat                   | cereal germ, soybean oil               |       | animal fat and oil (beef tallow),<br>cereal germ |       |
| Carbohydrates         | wheat flour, corn, milo                |       | wheat flour, corn, millet                        |       |

\*Data from URL of CLEA Japan, Inc.

[https://www.clea-japan.com/en/products/general\\_diet/item\\_d0030](https://www.clea-japan.com/en/products/general_diet/item_d0030)

[https://www.clea-japan.com/en/products/general\\_diet/item\\_d0070](https://www.clea-japan.com/en/products/general_diet/item_d0070)
